# Supplementary material
Source: publisher figshare collection journal article supplement (https://acs.figshare.com/ndownloader/files/5841105)
Supplement: Supplementary file 1 [file 5841105]

## **Supporting informations**

**An Unexpected Stereochemistry in the “Lithium Salt Catalyzed” Ring Expansion of non Racemic Oxaspiropentanes. Formal Synthesis of (-)-(4*R*,5*R*)-Muricatacin and the Pheromone (*R*)-Japonilure.**

*Angela M. Bernard,\* Angelo Frongia, Pier P. Piras,\* Francesco Secci*

Dipartimento di Scienze Chimiche, Università degli studi di Cagliari, Cittadella Universitaria di Monserrato, S.S 554, Bivio per Sestu, I-09042 Monserrato (Cagliari), Italy.

pppiras@unica.it

**(2*R*)-2-[(4*S*)-2,2-Dimethyl-[1,3]dioxolan-4-yl]-cyclobutanone. (*R,S*)-3.** A solution of the oxaspiropentane (*R,R*)-2 (200 mg, 1.2 mmol), with a catalytic amount (1%) of LiI in CH<sub>2</sub>Cl<sub>2</sub> (10mL) was refluxed for 5 h. The solution after cooling and filtration was evaporated under vacuum to give the crude cyclobutanone which was purified by flash chromatography (silica gel, diethyl ether / light petroleum, 1/1). Colourless oil. Yield 81 %.  $[\alpha]_D^{23} = +5.38$  (c, 0.14, CH<sub>2</sub>Cl<sub>2</sub>). <sup>1</sup>H NMR (CDCl<sub>3</sub>)  $\delta$ : 1.35 (s, 6H), 1.91-2.22 (m, 2H), 2.99 (t, 2H,  $J = 8.4$  Hz), 3.39-3.46 (m, 1H), 3.81 (t, 1H,  $J = 8.1$  Hz), 3.91 (dd, 1H,  $J = 8.1$  Hz and  $J = 6$  Hz), 4.15-4.19 (m, 1H). <sup>13</sup>C NMR  $\delta$ : 13.53, 25.56, 26.12, 45.32, 61.12, 66.50, 74.24, 109.15, 208.56. IR (neat, cm<sup>-1</sup>): 1780. MS  $m/z$ : 155 ( $M^+ - 15$  (2)), 113 (17), 95 (4), 84 (26), 72(25), 43 (100).. Anal. Calcd. for C<sub>9</sub>H<sub>14</sub>O<sub>3</sub>: C, 63.51; H, 8.29. Found: C, 63.64; H, 8.24.

**(2*S*)-2-[(4*S*)-2,2-Dimethyl-[1,3]dioxolan-4-yl]-cyclobutanone. (*S,S*)-3.** A solution of the oxaspiropentane (*S,R*)-2 (200 mg, 1.2 mmol), with LiClO<sub>4</sub> (254 mg, 2.4 mmol) in benzene (10 mL) was refluxed for 24 h. The solution after cooling and filtration, was evaporated under vacuum to give a 10 : 90 mixture of (*R,S*)-3 and (*S,S*)-3. Repeated chromatographies (silica gel, diethyl ether / light petroleum 1/1) gave a pure sample of (*S,S*)-3 as a colourless oil. Yield 85 %.  $[\alpha]_D^{23} = -6.55$  (c, 0.61, CH<sub>2</sub>Cl<sub>2</sub>). <sup>1</sup>H NMR (CDCl<sub>3</sub>)  $\delta$ : 1.33 (s, 3H), 1.35 (s, 3H), 2.08-2.14 (m, 2H), 2.94-3.03 (m, 2H), 3.43-3.47 (m, 1H), 3.61 (t, 1H,  $J = 7.8$  Hz), 4.05 (dd, 1H,  $J = 6.6$  Hz and  $J = 7.8$  Hz), 4.37 (q, 1H,  $J = 6.6$  Hz). <sup>13</sup>C NMR  $\delta$ : 12.77, 25.34, 26.46, 45.61, 62.53, 67.43, 73.32, 109.21, 208.57. IR (neat, cm<sup>-1</sup>): 1780. MS  $m/z$ : 155 ( $M^+ - 15$  (5)), 113. (25), 95 (4), 84 (26), 72 (25), 43 (100).. Anal. Calcd. for C<sub>9</sub>H<sub>14</sub>O<sub>3</sub>: C, 63.51; H, 8.29. Found: C, 63.44; H, 8.19.

**(4'*R*,5*R*)-5-(2,2-Dimethyl-1,3-dioxolan-4-yl)-4,5-dihydro-2(3*H*)-furanone. (*R,R*)-4.** To a stirred solution of the cyclobutanone (*R,S*)-3 (1g, 5.9 mmol) in CH<sub>2</sub>Cl<sub>2</sub> (30mL) at 0°C was added 1.44 g of MCPBA (5.9 mmol). The resulting white suspension was stirred at room temperature for 2 h and then diluted with CH<sub>2</sub>Cl<sub>2</sub>, filtered and washed with 10 % NaHCO<sub>3</sub> solution. The organic solution was dried and concentrated under vacuum to give the crude lactone which was purified by column chromatography (silica gel, diethyl ether / light petroleum, 3/1). Colourless oil. Yield 68 %.  $[\alpha]_D^{24} = -18$  (c 7.71, CHCl<sub>3</sub>). Lit<sup>37</sup>:  $[\alpha]_D^{19} = -20$  (c 1.0, CHCl<sub>3</sub>).

**(4*R*,5*R*)-5,6-Dihydroxy-4-hexanolide (5).** A mixture of the  $\gamma$ -lactone (*R,R*)-**4** (200 mg, 1.07 mmol) and FeCl<sub>3</sub>-SiO<sub>2</sub> reagent (21 mg) in CH<sub>2</sub>Cl<sub>2</sub> (12 mL) was stirred at room temperature for 48 h. Filtration of the organic layer and evaporation of the solvent under vacuum left a residue that was purified by column chromatography on silica gel (dichloromethane/methanol, 10/1) to give the product (*R,R*)-**5**. Colourless oil. Yield 96 %.  $[\alpha]_D^{23} = -38.62$  (c, 1.86, CH<sub>3</sub>OH). Lit.<sup>26a</sup>  $[\alpha]_D = -43.38$  (c 0.9, CH<sub>2</sub>Cl<sub>2</sub>).

**(1*S*,4*R*,5*S*)-1-Methoxy-2-oxabicyclo[3.2.0]-2-eptanol (8).** A solution of (*R,S*)-**3** (1 g, 6.2 mmol) in methanol with a catalytic amount of p-toluensulfonic acid was refluxed for 3 h. The solution was then washed with 10 % NaHCO<sub>3</sub>, dried and evaporated. The crude product was chromatographed on silica gel (diethyl ether / light petroleum, 3/1). Colourless oil. Yield 68 %.  $[\alpha]_D^{29} = +14$  (c 7.93, CHCl<sub>3</sub>). <sup>1</sup>H NMR (CDCl<sub>3</sub>)  $\delta$ : 1.66-1.89 (m, 2H), 2.08-2.36 (m, 3H, 1H exchange with D<sub>2</sub>O), 2.90 (q, 1H,  $J = 7.2$  Hz), 3.22 (s, 3H), 3.76 (dd, 1H,  $J = 6$  Hz and  $J = 9.3$  Hz), 4.19 (dd, 1H,  $J = 6$  Hz and  $J = 9.3$  Hz), 4.55 (q, 1H,  $J = 7.2$  Hz). <sup>13</sup>C NMR (CDCl<sub>3</sub>)  $\delta$ : 8.76, 30.19, 45.92, 49.97, 71.45, 73.86, 109.57. IR (neat, cm<sup>-1</sup>): 3430. MS  $m/z$ : 145 (M<sup>+</sup>-15 (6)), 127 (38), 113 (76), 99(100). Anal. Calcd. For C<sub>7</sub>H<sub>12</sub>O<sub>3</sub>: C, 58.33; H, 8.33. Found: C, 57.93, H, 8.38.

**(5*R*)-5-Hydroxymethyl-2-oxotetrahydrofuran (10).** To a stirred suspension of silica gel (4g) in CH<sub>2</sub>Cl<sub>2</sub> (32 mL) a solution of NaIO<sub>4</sub> (428 mg, 2 mmol) in water (4 mL) was added dropwise at room temperature. Then a solution of (*R,R*)-**5** (300 mg, 2 mmol) in CH<sub>2</sub>Cl<sub>2</sub> (4 mL) was added dropwise to the suspension at 0°C. The mixture was stirred for 30 minutes at same temperature and then diluted with CH<sub>2</sub>Cl<sub>2</sub> and the produced solid was filtered off. The organic solvent was dried and concentrated under vacuum to give the crude aldehyde **9** which was used immediately for the next step.

NaBH<sub>4</sub> (64 mg, 1.7 mmol) was added in small portions to an ice cooled solution of crude **9** (220 mg, 1.7 mmol) in CH<sub>3</sub>OH (10 mL) and the mixture was stirred for 10 min. Then the reaction was quenched with sat. KHSO<sub>4</sub> and evaporated under vacuum to remove CH<sub>3</sub>OH. The residue was extracted with THF and the organic layer dried and concentrated to afford the crude alcohol **10** which was purified by column chromatography (silica gel, CH<sub>2</sub>Cl<sub>2</sub> / CH<sub>3</sub>OH, 20/1). Colourless oil. Yield 40 % for the two steps.  $[\alpha]_D^{24} = -5.9$  (c 1.5, EtOH). IR, <sup>1</sup>H NMR and <sup>13</sup>C NMR spectra were in good agreement with those reported in ref 40 for this compound.
